# Supplementary material
Source: PubMed Central journal article supplement (PMC7499248)
Supplement: jamaoncol-e203938-s001.pdf [file jamaoncol-e203938-s001.pdf]

## Supplementary Online Content

Mackintosh C, Yuan C, Ou F-S, et al. Association of coffee intake with survival in patients with advanced or metastatic colorectal cancer. *JAMA Oncol*. Published online September 17, 2020. doi:10.1001/jamaoncol.2020.3938

**eMethods.** Determination of *KRAS* and *NRAS* Mutation Status

**eTable.** Baseline Characteristics by Frequency of Total Coffee Consumption

This supplementary material has been provided by the authors to give readers additional information about their work.

**eMethods. Determination of *KRAS* and *NRAS* Mutation Status**

Patients who consented to be tested for *KRAS* agreed to submit two archival paraffin-embedded tumor tissue sections and one histology reference slide or one paraffin-embedded tumor block of previously resected primary colorectal tumor and/or a metastatic tumor deposit. *KRAS* and *NRAS* mutation status was determined using BEAMing (beads, emulsion, amplification, magnetics; Hamburg, Germany) technology.

**eTable. Baseline Characteristics by Frequency of Total Coffee Consumption**

| Characteristic                                 | Frequency of total coffee consumption |                  |                 |                    |                  | P Value <sup>a</sup> |
|------------------------------------------------|---------------------------------------|------------------|-----------------|--------------------|------------------|----------------------|
|                                                | Never (n=280)                         | <1 cup/d (n=301) | 1 cup/d (n=298) | 2-3 cups/d (n=229) | ≥4 cups/d (n=63) |                      |
| Age, years, median (range)                     | 54 (22-84)                            | 58 (21-82)       | 63 (24-85)      | 62 (36-82)         | 59 (42-82)       | <.001                |
| Male, No. (%)                                  | 142 (50.7)                            | 180 (59.8)       | 179 (60.1)      | 141 (61.6)         | 52 (82.5)        | <.001                |
| Race, No. (%)                                  |                                       |                  |                 |                    |                  | <.001                |
| White                                          | 223 (79.6)                            | 237 (78.7)       | 269 (90.3)      | 217 (94.8)         | 61 (96.8)        |                      |
| Black                                          | 33 (11.8)                             | 53 (17.6)        | 19 (6.4)        | 7 (3.1)            | 2 (3.2)          |                      |
| Other                                          | 16 (5.7)                              | 8 (2.7)          | 6 (2.0)         | 3 (1.3)            | 0                |                      |
| Unknown                                        | 8 (2.9)                               | 3 (1.0)          | 4 (1.3)         | 2 (0.9)            | 0                |                      |
| ECOG performance status <sup>b</sup> , No. (%) |                                       |                  |                 |                    |                  | .78                  |
| 0                                              | 167 (59.6)                            | 185 (61.5)       | 191 (64.1)      | 147 (64.2)         | 38 (60.3)        |                      |
| 1-2                                            | 113 (40.4)                            | 116 (38.5)       | 107 (35.9)      | 82 (35.8)          | 25 (39.7)        |                      |
| Prior adjuvant chemotherapy, No. (%)           |                                       |                  |                 |                    |                  | .07                  |
| No                                             | 253 (90.4)                            | 262 (87.0)       | 249 (83.6)      | 200 (87.3)         | 50 (79.4)        |                      |
| Yes                                            | 27 (9.6)                              | 39 (13.0)        | 49 (16.4)       | 29 (12.7)          | 13 (20.6)        |                      |
| Chemotherapy backbone, No. (%)                 |                                       |                  |                 |                    |                  | .51                  |
| mFOLFOX6                                       | 210 (75.0)                            | 244 (81.1)       | 229 (76.8)      | 178 (77.7)         | 49 (77.8)        |                      |
| FOLFIRI                                        | 70 (25.0)                             | 57 (18.9)        | 69 (23.2)       | 51 (22.3)          | 14 (22.2)        |                      |
| Assigned treatment arm, No. (%)                |                                       |                  |                 |                    |                  | .23                  |
| Bevacizumab                                    | 101 (36.1)                            | 109 (36.2)       | 121 (40.6)      | 98 (42.8)          | 25 (39.7)        |                      |
| Cetuximab                                      | 103 (36.8)                            | 123 (40.9)       | 105 (35.2)      | 67 (29.3)          | 26 (41.3)        |                      |
| Bevacizumab + cetuximab                        | 76 (27.1)                             | 69 (22.9)        | 72 (24.2)       | 64 (27.9)          | 12 (19.0)        |                      |
| Disease extent, No. (%)                        |                                       |                  |                 |                    |                  | .66                  |
| Locally advanced                               | 5 (1.8)                               | 3 (1.0)          | 3 (1.0)         | 4 (1.7)            | 2 (3.2)          |                      |
| Metastatic                                     | 274 (97.9)                            | 294 (97.7)       | 294 (98.7)      | 223 (97.4)         | 61 (96.8)        |                      |
| Missing                                        | 1 (0.4)                               | 4 (1.3)          | 1 (0.3)         | 2 (0.9)            | 0                |                      |
| Primary tumor location, No. (%)                |                                       |                  |                 |                    |                  | .37                  |
| Left                                           | 176 (62.9)                            | 182 (60.5)       | 162 (54.4)      | 128 (55.9)         | 39 (61.9)        |                      |
| Right                                          | 68 (24.3)                             | 76 (25.2)        | 79 (26.5)       | 68 (29.7)          | 21 (33.3)        |                      |
| Transverse                                     | 18 (6.4)                              | 22 (7.3)         | 26 (8.7)        | 14 (6.1)           | 1 (1.6)          |                      |
| Multiple                                       | 2 (0.7)                               | 1 (0.3)          | 3 (1.0)         | 0                  | 0                |                      |
| Unknown                                        | 16 (5.7)                              | 20 (6.6)         | 28 (9.4)        | 19 (8.3)           | 2 (3.2)          |                      |

|                                                          |                  |                  |                  |                  |                  |       |
|----------------------------------------------------------|------------------|------------------|------------------|------------------|------------------|-------|
| <i>RAS</i> status, No. (%)                               |                  |                  |                  |                  |                  | .27   |
| Wild-type                                                | 84 (30.0)        | 92 (30.6)        | 109 (36.6)       | 87 (38.0)        | 22 (34.9)        |       |
| Mutant                                                   | 69 (24.6)        | 71 (23.6)        | 73 (24.5)        | 62 (27.1)        | 15 (23.8)        |       |
| Unknown                                                  | 127 (45.4)       | 138 (45.9)       | 116 (38.9)       | 80 (34.9)        | 26 (41.3)        |       |
| Diabetes status, No. (%)                                 |                  |                  |                  |                  |                  | .97   |
| No                                                       | 231 (82.5%)      | 247 (82.1%)      | 245 (82.2%)      | 190 (83.0%)      | 54 (85.7%)       |       |
| Yes                                                      | 49 (17.5%)       | 54 (17.9%)       | 53 (17.8%)       | 39 (17.0%)       | 9 (14.3%)        |       |
| Body mass index, kg/m <sup>2</sup> , median (range)      | 28.0 (15.4-59.2) | 27.5 (17.1-54.8) | 27.5 (15.8-48.4) | 27.2 (15.4-58.4) | 27.5 (16.8-52.5) | .59   |
| Physical activity, MET-h/week, median (range)            | 4 (0-174)        | 4 (0-123)        | 3 (0-113)        | 4 (0-132)        | 3 (0-113)        | .90   |
| Smoking status, No. (%)                                  |                  |                  |                  |                  |                  | <.001 |
| Never                                                    | 170 (60.7)       | 151 (50.2)       | 137 (46.0)       | 56 (24.5)        | 12 (19.0)        |       |
| Past                                                     | 95 (33.9)        | 128 (42.5)       | 132 (44.3)       | 131 (57.2)       | 31 (49.2)        |       |
| Current                                                  | 12 (4.3)         | 20 (6.6)         | 28 (9.4)         | 41 (17.9)        | 19 (30.2)        |       |
| Missing                                                  | 3 (1.1)          | 2 (0.7)          | 1 (0.3)          | 1 (0.4)          | 1 (1.6)          |       |
| Aspirin use, No. (%)                                     |                  |                  |                  |                  |                  | <.001 |
| No                                                       | 241 (86.1%)      | 218 (72.4%)      | 199 (66.8%)      | 164 (71.6%)      | 45 (71.4%)       |       |
| Yes                                                      | 39 (13.9%)       | 81 (26.9%)       | 97 (32.6%)       | 64 (27.9%)       | 18 (28.6%)       |       |
| Unknown                                                  | 0                | 2 (0.7%)         | 2 (0.7%)         | 1 (0.4%)         | 0                |       |
| Total energy intake, kcal/day, median (range)            | 1729 (601-4038)  | 1714 (526-4012)  | 1829 (560-3946)  | 1956 (669-4088)  | 2237 (791-4122)  | <.001 |
| Alcohol intake, energy-adjusted, g/day, median (range)   | 0 (0-91)         | 0 (0-95)         | 1 (0-87)         | 1 (0-137)        | 1 (0-29)         | <.001 |
| Caffeine intake, energy-adjusted, mg/day, median (range) | 23 (0-431)       | 42 (1-454)       | 115 (3-375)      | 247 (6-754)      | 397 (31-2011)    | <.001 |

ECOG, Eastern Cooperative Oncology Group; MET, metabolic equivalent

<sup>a</sup>Kruskal-Wallis test used to compare continuous variables; chi-square test or Fisher's exact test used to compare categorical variables.

<sup>b</sup>Grade 0 = fully active, able to carry on all pre-disease performance without restriction; grade 1 = restricted in physically strenuous activity but ambulatory and able to carry out work of a light or sedentary nature, e.g., light house work, office work; grade 2 = ambulatory and capable of all selfcare but unable to carry out any work activities, up and about more than 50% of waking hours.
